# Supplementary material for: Introduction of a secondary ligand into titanium-based metal–organic frameworks for visible-light-driven photocatalytic hydrogen peroxide production from dioxygen reduction
Source: Royal Society of Chemistry journal article supplement (doi:10.1039/d0ta10944d), 2020-12-23
Supplement: d0ta10944d1.pdf [file d0ta10944d1.pdf]

## Supporting Information

### **Introduction of Secondary Ligand in Titanium-Based Metal-Organic Frameworks for Visible-Light-Driven Photocatalytic Hydrogen Peroxide Production from Dioxygen Reduction**

Xiaolang Chen,<sup>a</sup> Yasutaka Kuwahara,<sup>abc</sup> Kohsuke Mori,<sup>ab</sup> Catherine Louis,<sup>d</sup> and Hiromi Yamashita<sup>\*ab</sup>

Xiaolang Chen,<sup>a</sup> Yasutaka Kuwahara,<sup>abc</sup> Kohsuke Mori,<sup>ab</sup> Catherine Louis,<sup>d</sup> and Hiromi Yamashita<sup>\*ab</sup>

<sup>a</sup> Graduate School of Engineering, Osaka University, 2-1 Yamadaoka, Suita, Osaka 565-0871, Japan.

E-mail: yamashita@mat.eng.osaka-u.ac.jp

<sup>b</sup> Elements Strategy Initiative for Catalysts and Batteries (ESICB), Kyoto University, Katsura, Kyoto 615-8520, Japan

<sup>c</sup> JST, PRESTO, 4-1-8 Honcho, Kawaguchi, Saitama 332-0012, Japan

<sup>d</sup> Sorbonne Université, CNRS, Laboratoire de Réactivité de Surface (LRS), F-75005 Paris, France

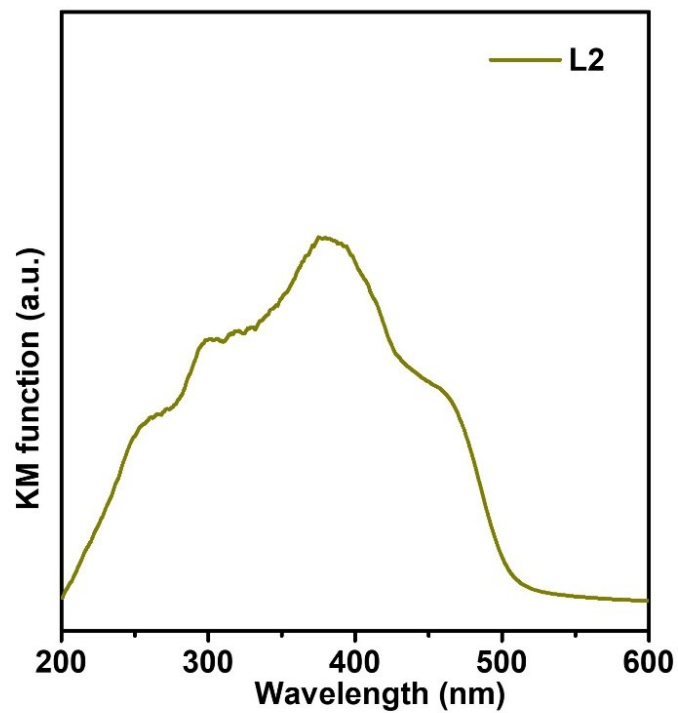

Fig. S1 UV-vis DRS of L2.

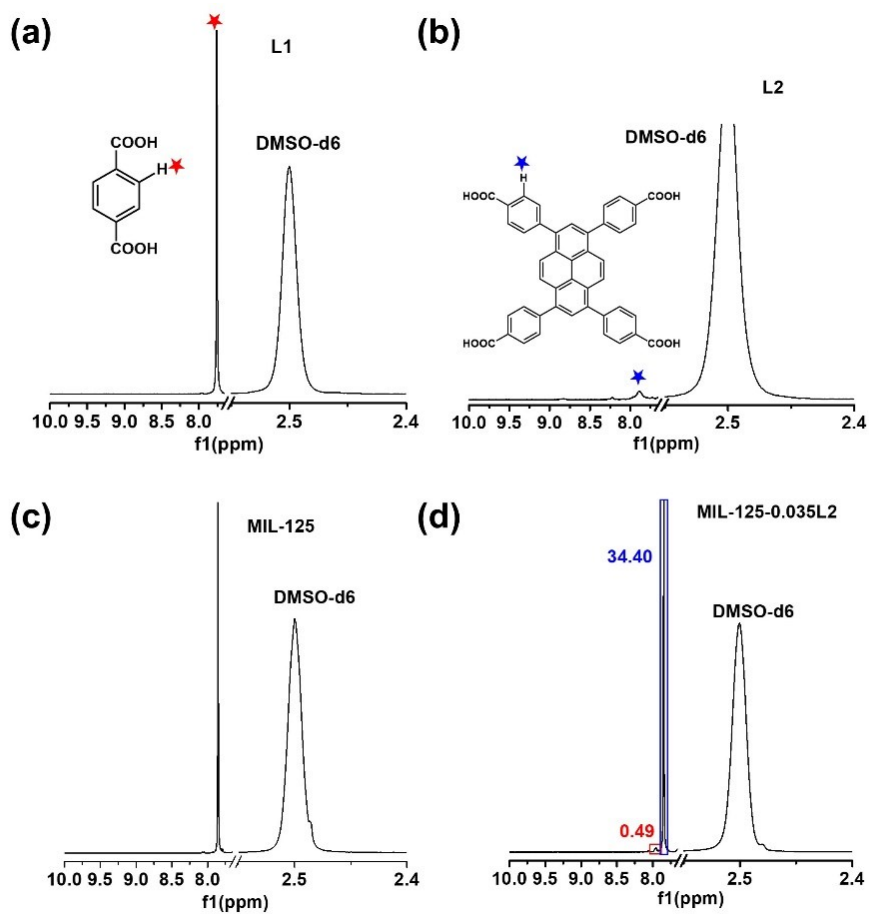

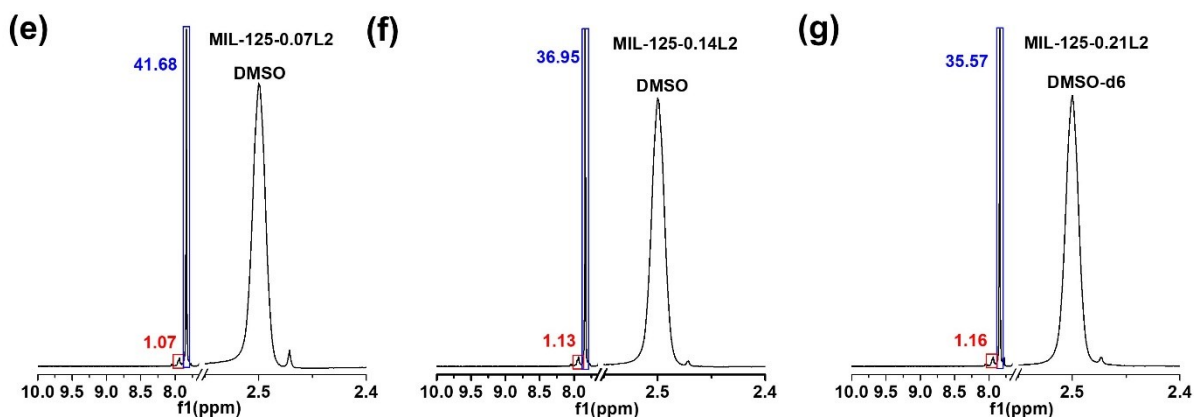

**Fig. S2**  $^1\text{H}$  NMR spectra of (a) L1, (b) L2, (c) MIL-125, and (d-g) MIL-125-xL2 ( $x = 0.035, 0.07, 0.14,$  and  $0.21$ ).

**Table S1.** The ligand ratios (L1/L2) calculated from  $^1\text{H}$  NMR data of digested samples. Molecular formula of MIL-125:  $\text{Ti}_8\text{O}_8(\text{OH})_4(\text{L1})_6$ .

| Samples         | L1/L2  |                                              |
|-----------------|--------|----------------------------------------------|
| MIL-125         |        | $\text{Ti}_8(\text{L1})_6$                   |
| MIL-125-0.035L2 | 6:0.04 | $\text{Ti}_8(\text{L1})_6(\text{L2})_{0.04}$ |
| MIL-125-0.07L2  | 6:0.08 | $\text{Ti}_8(\text{L1})_6(\text{L2})_{0.08}$ |
| MIL-125-0.14L2  | 6:0.09 | $\text{Ti}_8(\text{L1})_6(\text{L2})_{0.09}$ |
| MIL-125-0.21L2  | 6:0.10 | $\text{Ti}_8(\text{L1})_6(\text{L2})_{0.10}$ |

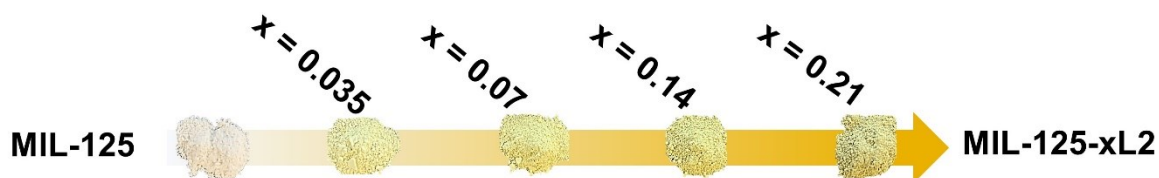

**Fig. S3** Photos of MIL-125 and MIL-125-xL2 ( $x = 0.035, 0.07, 0.14,$  and  $0.21$ ).

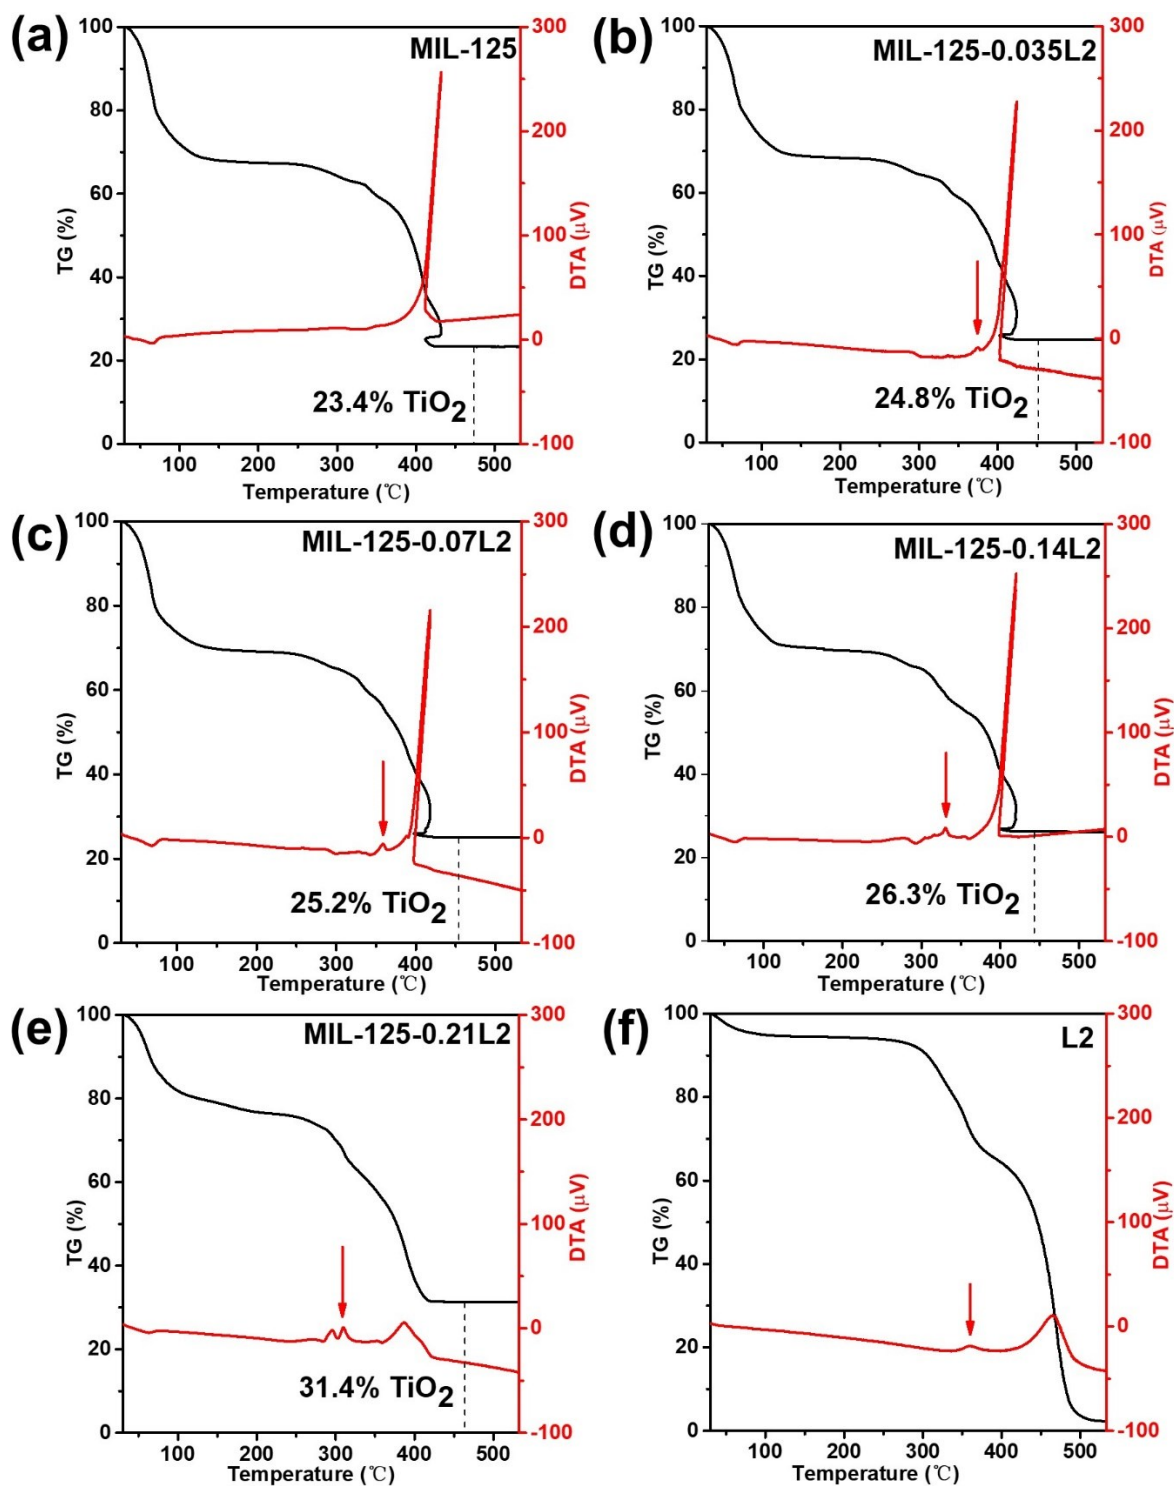

**Fig. S4** TG and DTA profiles of (a) MIL-125, (b-e) MIL-125-xL2 ( $x = 0.035, 0.07, 0.14, \text{ and } 0.21$ ), and (f) L2.

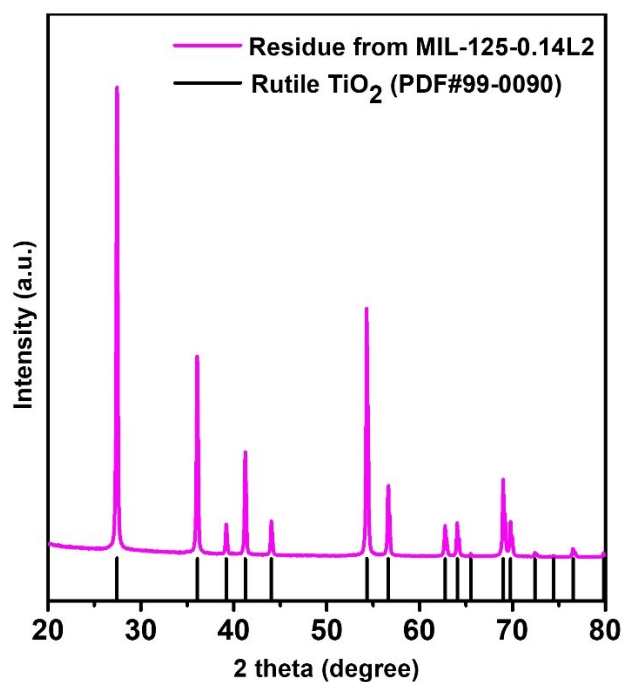

**Fig. S5** XRD patterns of MIL-125-0.14L2 after being heated with temperature ramp of 1.0 °C min<sup>-1</sup> up to 800 °C in air.

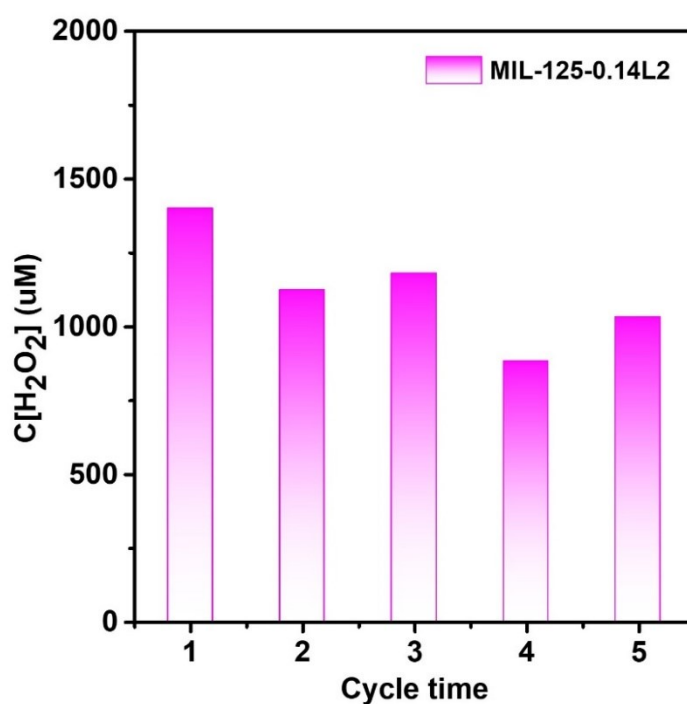

**Fig. S6** Recycling tests of H<sub>2</sub>O<sub>2</sub> in O<sub>2</sub>-saturated CH<sub>3</sub>CN solution (10 mL) of TEOA (2 mL) under photoirradiation ( $\lambda > 400$  nm) using 10 mg of MIL-125-0.14L2.

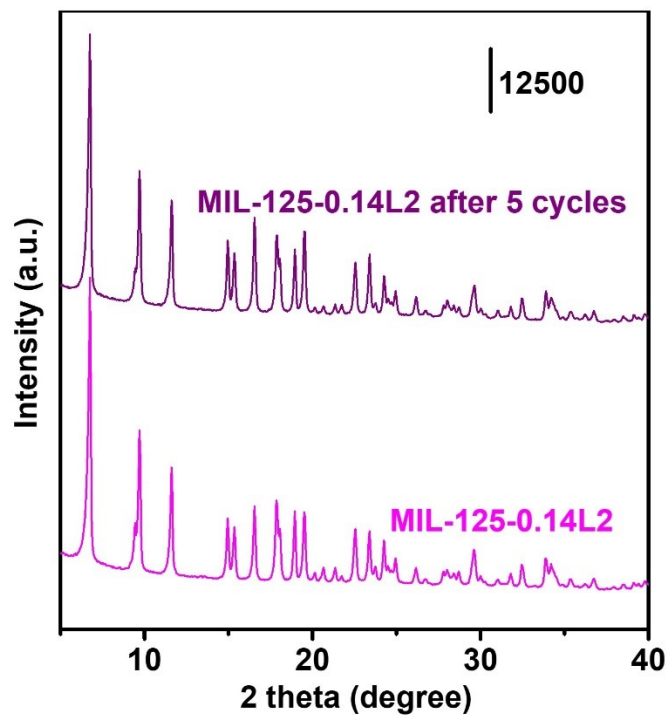

**Fig. S7** XRD patterns of MIL-125-0.14L2 after 5 recycling tests.

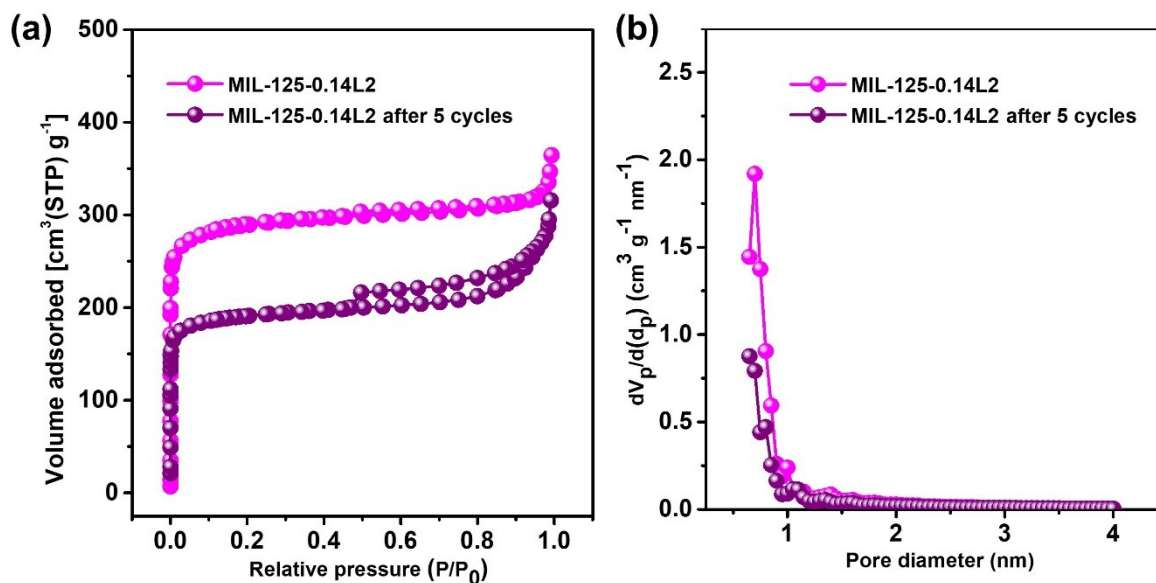

**Fig. S8** (a) N<sub>2</sub> adsorption/desorption isotherms and (b) pore diameter distribution of MIL-125-0.14L2 after 5 recycling tests.

**Table S2.** BET surface area and  $V_p$  of MIL-125-0.14L2 after 5 recycling tests.

| Samples        | $S_{\text{BET}}$ ( $\text{cm}^2 \text{g}^{-1}$ ) | $D_p$ (nm) | $V_p$ ( $\text{cm}^3 \text{g}^{-1}$ ) |
|----------------|--------------------------------------------------|------------|---------------------------------------|
| MIL-125-0.14L2 | 800                                              | 0.70       | 0.43                                  |
| After 5 cycles | 532                                              | 0.70       | 0.29                                  |

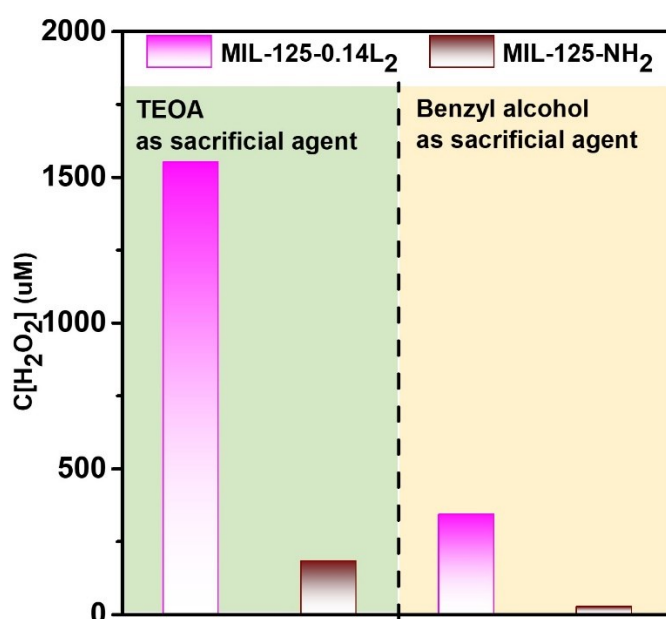

**Fig. S9** Activity comparison of MIL-125-0.14L2 and MIL-125-NH<sub>2</sub> using TEOA or benzyl alcohol as sacrificial agent after 1 h of reaction. Reaction conditions: 5 mg of MOFs in O<sub>2</sub>-saturated CH<sub>3</sub>CN solution (5 mL) of TEOA (1 mL), or 10 mg of MOFs in O<sub>2</sub>-saturated CH<sub>3</sub>CN solution (10 mL) of benzyl alcohol (2 mL) under photoirradiation ( $\lambda > 420$  nm).

**Table S3.** Comparison of the photocatalytic H<sub>2</sub>O<sub>2</sub> production on some of other typical photocatalysts under similar reaction conditions summarized in the recent review report (Angew. Chem. Int. Ed. **2020**, *59*, 17356–17376).

| Photocatalyst                                                         | Sacrificial reagent or reaction solution                                  | Catalyst concentration  | Irradiation conditions | Activity of H <sub>2</sub> O <sub>2</sub> |
|-----------------------------------------------------------------------|---------------------------------------------------------------------------|-------------------------|------------------------|-------------------------------------------|
| mesoporous g-C <sub>3</sub> N <sub>4</sub>                            | ethanol                                                                   | 4 mg mL <sup>-1</sup>   | λ > 420 nm             | 90 μmol (24 h)                            |
| (K,P,O)-g-C <sub>3</sub> N <sub>4</sub>                               | ethanol                                                                   | 0.5 mg mL <sup>-1</sup> | λ ≥ 420 nm             | 1.7 mM (7h)                               |
| CoP/g-C <sub>3</sub> N <sub>4</sub>                                   | ethanol                                                                   | 1.0 mg mL <sup>-1</sup> | λ > 420 nm             | 140 μM (2 h)                              |
| Au/g-C <sub>3</sub> N <sub>4</sub>                                    | 2-propanol                                                                | 1.0 mg mL <sup>-1</sup> | UV/Vis                 | 747 μmol (2 h)                            |
| KPF <sub>6</sub> /g-C <sub>3</sub> N <sub>4</sub>                     | ethanol                                                                   | 0.5 mg mL <sup>-1</sup> | λ > 420 nm             | 1.5 mM (5 h)                              |
| [Ru <sup>II</sup> (Me <sub>2</sub> phen) <sub>3</sub> ] <sup>2+</sup> | O <sub>2</sub> -saturated aqueous H <sub>2</sub> SO <sub>4</sub> solution | 1.0 μM                  | λ > 420 nm             | 612 μM (9 h)                              |
| silica/graphene oxide/CdS                                             | alcohol                                                                   | 0.5 g L <sup>-1</sup>   | λ = 635 nm             | 90 μM (1 h)                               |
| CdS-graphene                                                          | Water + methanol                                                          | 1.0 mg mL <sup>-1</sup> | Solar simulator        | 128 μM (12 h)                             |
| O <sub>v</sub> -Bi/Bi <sub>2</sub> O <sub>2-x</sub> CO <sub>3</sub>   | Water + C <sub>2</sub> H <sub>5</sub> OH                                  | 4.0 mg mL <sup>-1</sup> | λ ≥ 420 nm             | 1.2 mM (3 h)                              |
| MIL-125-0.14L2                                                        | TEOA                                                                      | 1.0 mg mL <sup>-1</sup> | λ > 400 nm             | 1654 μM (1 h)                             |
| Our work                                                              | Benzyl alcohol                                                            |                         |                        | 1103 μM (1 h)                             |
